# Supplementary material for: Interfacial carrier transport properties of a gallium nitride epilayer/quantum dot hybrid structure
Source: Royal Society of Chemistry journal article supplement (doi:10.1039/d1ra08680d), 2022-01-01
Supplement: d1ra08680d1.pdf [file d1ra08680d1.pdf]

## **Interfacial Carrier Transport Property of Gallium Nitride Epilayer/Quantum Dot Hybrid Structure**

Huiyun Wei<sup>a,c,d</sup>, Peng Qiu<sup>a</sup>, Meina Yu<sup>b</sup>, Yimeng Song<sup>a</sup>, Ye Li<sup>a</sup>, Yingfeng He<sup>a</sup>,

Mingzeng Peng<sup>a</sup>, Xiaohu Liu<sup>c,d\*</sup>, and Xinhe Zheng<sup>a\*</sup>

<sup>a</sup>*Beijing Advanced Innovation Center for Materials Genome Engineering, Beijing Key Laboratory for Magneto-Photoelectrical Composite and Interface Science, School of Mathematics and Physics, University of Science and Technology Beijing, Beijing, 100083, PR China*

<sup>b</sup>*University of Science and Technology Beijing, Beijing, 100083, PR China*

<sup>c</sup>*School of Biomedical Engineering, School of Ophthalmology & Optometry, Wenzhou Medical University, Wenzhou 325027, PR China.*

<sup>d</sup>*Engineering Research Center of Clinical Functional Materials and Diagnosis & Treatment Devices of Zhejiang Province, Wenzhou Institute, University of Chinese Academy of Sciences (Wenzhou Institute of Biomaterials & Engineering), Wenzhou 325027, PR China.*

\*Correspondence: liuxiaohu@wmu.edu.cn; xinhezhenh@ustb.edu.cn;

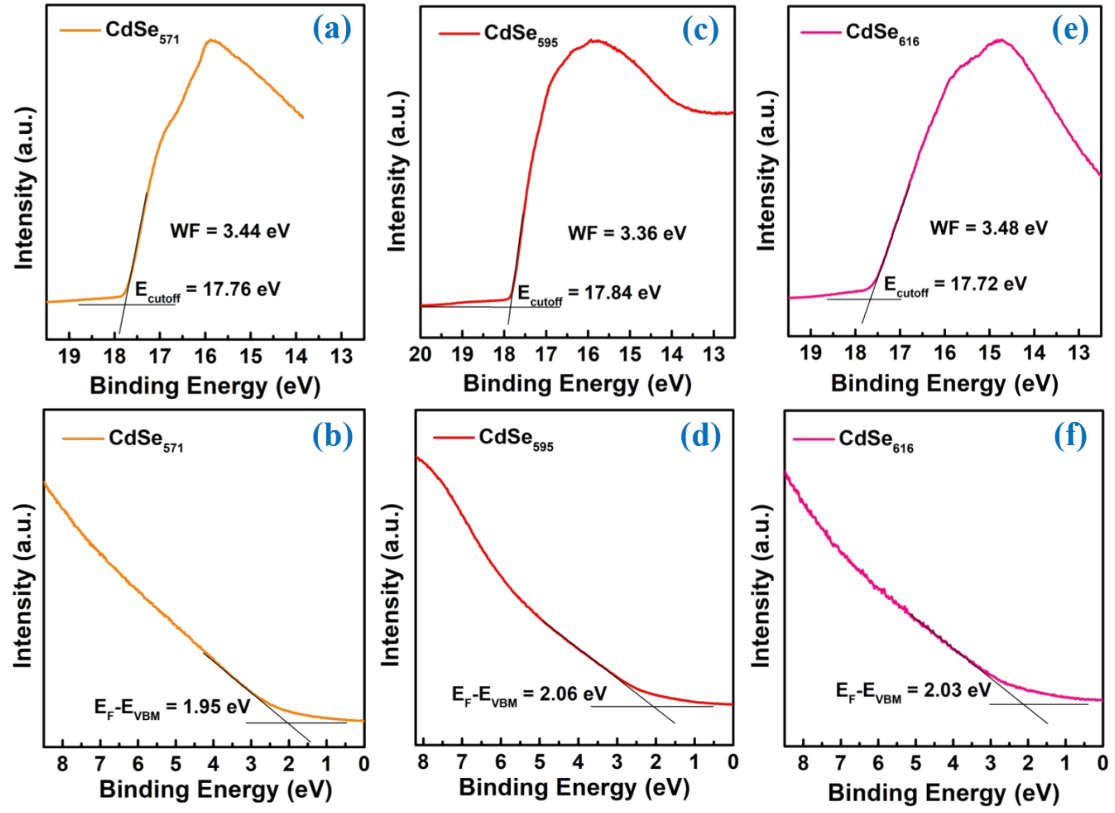

**Figure S1.** UPS spectra of the  $\text{CdSe}_{571}$  QDs,  $\text{CdSe}_{595}$  QDs and  $\text{CdSe}_{616}$  QDs.
